# Supplementary material for: We all fall down: head injuries in nursery rhyme characters
Source: HighWire-hosted journal article supplement (doi:10.1136/bmj-2021-068256), 2021-12-15

Head injuries in nursery rhymes provide an interesting way to discuss the biomechanics and prevention of such injuries. Writing in *The BMJ*, Declan Patton presents a comprehensive new dataset from nursery rhymes in which an incident was described that involved, or was suspected of involving, a head impact. A wide range of injured parties were identified, from humans to animals, and even an anthropomorphic egg. This graphic presents this dataset in its entirety, including coded information that could inform the authors of future nursery rhymes and decrease the likelihood of head injuries for literary characters.

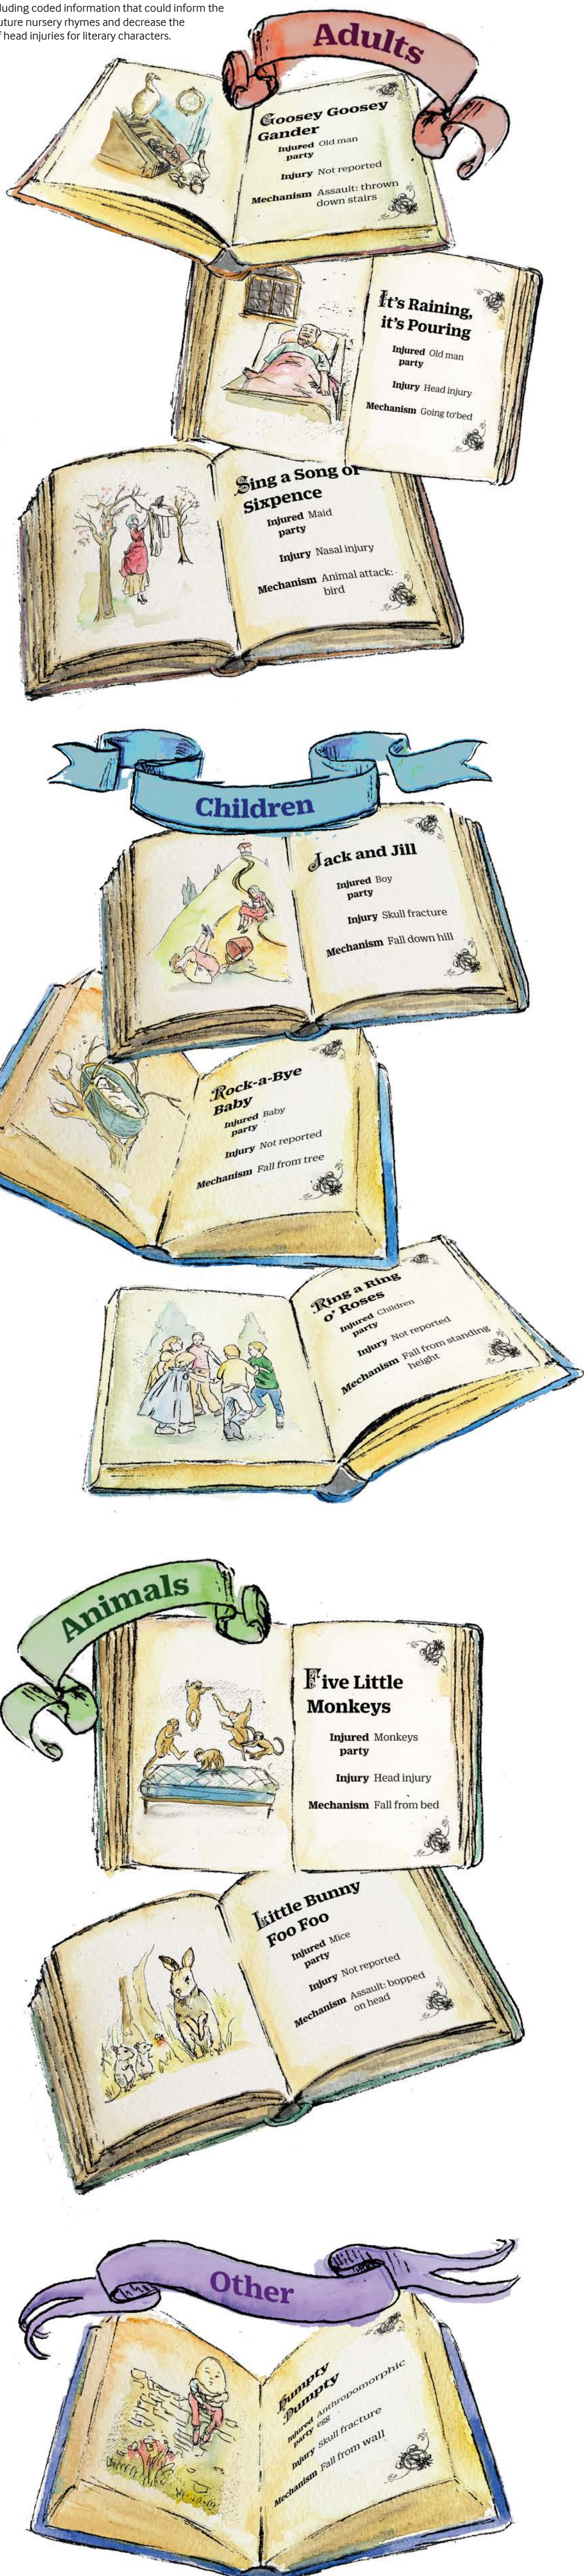

Supplement: patd068256.ww.pdf [file patd068256.ww.pdf]
